# Supplementary material
Source: ML conference proceedings conference paper supplement (https://proceedings.neurips.cc/paper_files/paper/2023/hash/240225294cdd2c9b692c2519d3278a08-Abstract.html)
Supplement: Supplementary file 1 [file 240225294cdd2c9b692c2519d3278a08-Supplemental-Conference.pdf]

## 6 Supplementary material

### 6.1 Animal ethics statement

All experiments on animals were conducted with approval of the Animal Care and Use Committee of the University of California, Berkeley.

### 6.2 Compute

All computational procedures were performed either on a desktop workstation running Ubuntu 18.04 with an Intel Xeon E5-2620 v4 CPU, four GTX 1080 Ti GPUs, and 112GB RAM, or on the Axon computer cluster based at [redacted for anonymity] using nodes comprised of two Xeon E5-2660 v4 CPUs, eight GTX 1080 Ti GPUs, and 125GB RAM.

### 6.3 Broader societal impact

Our work is significant for interventional approaches to studying the brain and its connection to disease. By minimising off-target activation, Bayesian target optimisation could enable (e.g.) more precise synaptic connectivity mapping, improving our understanding of neural circuitry. This advancement has potential implications for understanding brain disorders like epilepsy, where abnormal synaptic connections are central to seizure generation and propagation. Deepening our understanding of these diseases can lead to enhanced targeted interventions and more effective therapeutic strategies, benefiting individuals with neurological disorders.

### 6.4 Code availability

An open-source implementation of Bayesian target optimisation is available in Python at <https://anonymous.4open.science/r/bataro-4401/>.

### 6.5 Single-target holographic stimulus optimisation with posterior uncertainty

Here we provide further mathematical details for optimising holographic stimuli. First, we develop the approach for single optogenetic targets, as this is most closely related to existing GP-based receptive field inference techniques. The single-target case also allows us to have a full treatment of posterior uncertainty (unlike for optimising ensemble stimuli) which may be desired in certain applications.

**Optogenetic receptive field model.** We use a GP-Bernoulli approach to model the response  $y_{nt}$  of neuron  $n$  on trial  $t$  to a single-target stimulus  $\mathbf{x}_t$ ,

$$y_{nt} \sim \text{Bernoulli}(\sigma(g_n(\mathbf{x}_t))), \quad (9)$$

where the stimulus  $\mathbf{x}_t = (c_{1t}, c_{2t}, I_t) \in \mathbb{R}^3$  represents the two-dimensional coordinates and laser power of the  $t$ -th hologram. Each ORF follows a three-dimensional GP prior  $g_n \sim \mathcal{GP}(m_n(\cdot), k(\cdot, \cdot))$ , where  $m_n$  and  $k$  again are the mean and covariance functions of the GP.

**Posterior inference.** Unlike for ensemble stimulation, for single-target stimulation we do not require that the ORF  $g_n$  is non-negative. Consequently, the posterior of  $g_n$  is a GP, which allows us to work with a full description of posterior uncertainty. To compute the posterior, we use the conventional Laplace approximation. Briefly, this consists of approximating the posterior using a multivariate normal  $q(g_n | \boldsymbol{\mu}_n, \boldsymbol{\Sigma}_n) = \text{Normal}(g_n | \boldsymbol{\mu}_n, \boldsymbol{\Sigma}_n) \approx p(g_n | \mathbf{y}_n, \mathbf{X}, \phi)$ . The mean  $\boldsymbol{\mu}_n$  is obtained by maximising the log-posterior, given by the expression

$$\ln p(g_n | \mathbf{y}_n, \mathbf{X}, \phi) = \sum_{t=1}^T \ln p(y_{nt} | \mathbf{x}_t, g_n) + \ln p(g_n(\mathbf{x}_1), \dots, g_n(\mathbf{x}_T) | \phi) + \text{const}, \quad (10)$$

where  $\mathbf{X} = (\mathbf{x}_1, \dots, \mathbf{x}_T)$  and where const does not depend on  $g_n$ . Since the posterior is log-concave in  $g_n$ , we use Newton’s method to identify the global optimum of Equation 10, and adaptively set the Newton step-size using a standard backtracking line-search method. Letting  $\mathbf{H} = \nabla \nabla_{g_n} \ln p(g_n | \mathbf{y}_n, \mathbf{X}, \phi)$  be the Hessian of the log-posterior, the posterior covariance matrix is obtained by setting  $\boldsymbol{\Sigma}_n = -\mathbf{H}^{-1} |_{g_n=\boldsymbol{\mu}_n}$ .

452 **Target optimisation.** Let  $G = (g_1, \dots, g_N)$ , and define the predicted evoked activity for single  
 453 holographic targets as  $\hat{y}(\mathbf{x}, G) = (\sigma(g_1(\mathbf{x})), \dots, \sigma(g_N(\mathbf{x})))$ . To minimise the error between a target  
 454 binary activity pattern  $\Omega \in \{0, 1\}^N$  and the predicted evoked activity, we solve an optimisation  
 455 problem that accounts for the uncertainty in the ORF estimates:

$$\mathbf{x}_{\text{optimal}} = \underset{\mathbf{x}}{\operatorname{argmin}} \mathbb{E}_{q(G|\mu, \Sigma)} \left[ \|\Omega - \hat{y}(\mathbf{x}, G)\|^2 \right] \quad \text{such that} \quad 0 \leq I \leq I_{\max}, \quad (11)$$

456 where  $q(G | \mu, \Sigma) = \prod_{n=1}^N q(g_n | \mu_n, \Sigma_n)$  gives the joint posterior across all ORFs. To solve  
 457 Equation 11, we first sample ORFs  $g_n^{(s)}$  (for  $s = 1, \dots, S$ ) from their posterior distributions to  
 458 approximate the expected error at the current estimate  $\mathbf{x}^*$ ,

$$\mathbb{E}_{q(G|\mu, \Sigma)} \left[ \|\Omega - \hat{y}(\mathbf{x}^*, G)\|^2 \right] \approx \frac{1}{S} \sum_{s=1}^S \sum_{n=1}^N \left( \Omega_n - \sigma(g_n^{(s)}(\mathbf{x}^*)) \right)^2. \quad (12)$$

459 Then, we compute the partial derivative (in dimension  $d$ ) of the expected error by differentiating  
 460 through the Monte Carlo approximation,

$$\frac{\partial}{\partial x_d^*} \mathbb{E}_{q(G|\mu, \Sigma)} \left[ \|\Omega - \hat{y}(\mathbf{x}^*, G)\|^2 \right] \approx -\frac{2}{S} \sum_{s=1}^S \sum_{n=1}^N (\Omega_n - \sigma(g_n^{(s)}(\mathbf{x}^*))) \sigma'(g_n^{(s)}(\mathbf{x}^*)) \frac{\partial}{\partial x_d^*} g_n^{(s)}(\mathbf{x}^*). \quad (13)$$

461 Next we must evaluate the partial derivative on the right-hand side of Equation 13. We use the fact  
 462 that a GP and its derivative are jointly GP-distributed, and hence infer the derivative from observations  
 463 of the ORF. The covariance between a GP and its derivative is given by [40, Sec 9.4]

$$\operatorname{cov} \left( g_n(\mathbf{x}_t), \frac{\partial}{\partial x_d^*} g_n(\mathbf{x}^*) \right) = \frac{\partial k(\mathbf{x}_t, \mathbf{x}^*)}{\partial x_d^*} = \frac{\alpha^2}{\lambda_d^2} (x_{dt} - x_d^*) \exp \left( -\frac{\|\mathbf{x}_t - \mathbf{x}^*\|^2}{2\lambda_d^2} \right), \quad (14)$$

464 where the second equality is specific to the RBF covariance. Thus, we can use Equation 14 to obtain  
 465 the posterior predictive mean for the derivative GPs in closed form as [46, Sec 2.7]

$$\mathbb{E}_{q(g_n|\mu_n, \Sigma_n)} \left[ \frac{\partial g_n(\mathbf{x}^*)}{\partial x_d^*} \right] = \frac{\partial m_n(\mathbf{x}^*)}{\partial x_d^*} + \operatorname{cov} \left( g_n(\mathbf{X}), \frac{\partial g_n(\mathbf{x}^*)}{\partial x_d^*} \right)^\top \mathbf{K}^{-1}(\mu_n - m_n(\mathbf{X})). \quad (15)$$

466 Here  $\mathbf{X} = (\mathbf{x}_1, \dots, \mathbf{x}_T)$  is the collection of unique points on the ORF probed during calibration.  
 467 If Equation 15 is combined with an expression for the posterior predictive variance, one obtains a  
 468 full predictive distribution over derivative functions consistent with the observed neural responses.  
 469 However, rather than working with this full distribution, we instead use Equation 15 to approximate  
 470 the derivatives of the Monte Carlo samples by replacing the posterior mean  $\mu_n$  with a Monte Carlo  
 471 sample,

$$\frac{\partial g_n^{(s)}(\mathbf{x}^*)}{\partial x_d^*} \approx \frac{\partial m_n(\mathbf{x}^*)}{\partial x_d^*} + \operatorname{cov} \left( g_n(\mathbf{X}), \frac{\partial g_n(\mathbf{x}^*)}{\partial x_d^*} \right)^\top \mathbf{K}^{-1}(g_n^{(s)}(\mathbf{X}) - m_n(\mathbf{X})). \quad (16)$$

472 Equation 16 then allows us to define a closed-form approximate gradient  $\tilde{\nabla}_{\mathbf{x}^*} g_n^{(s)}$  at test point  $\mathbf{x}^*$ ,  
 473 defined as

$$\tilde{\nabla}_{\mathbf{x}^*} g_n^{(s)} = \left[ \frac{\partial g_n^{(s)}(\mathbf{x}^*)}{\partial x_1^*}, \dots, \frac{\partial g_n^{(s)}(\mathbf{x}^*)}{\partial x_D^*} \right]^\top, \quad (17)$$

474 which we use in the single-target projected gradient descent algorithm (Algorithm 2). Note that one  
 475 could also consider a quadrature approach to solving Equation 12, which may be more efficient than  
 476 Monte Carlo sampling. However, the presentation of the Monte Carlo approach is instructive for  
 477 deriving the optimisation of ensemble stimuli below.

## 478 6.6 Additional details on ensemble stimulus optimisation approach

479 The approach for optimising holographic ensemble stimuli is based on the approach for single-target  
 480 optimisation, but modified to account for differences in the ORF model and inference. In particular,  
 481 we again seek to minimise the error between a target activity pattern  $\Omega$  and the predicted evoked

---

**Algorithm 2:** Projected Monte Carlo gradient descent algorithm for optimising single-target holograms

---

```

1 Infer ORF posterior  $q(G \mid \boldsymbol{\mu}, \boldsymbol{\Sigma})$  from calibration data  $\{\mathbf{y}_n\}_{n=1}^N, \mathbf{X}$  using the Laplace
  approximation.
2 Precompute the negative of the Hessian  $\mathbf{W}_n = -\nabla\nabla \ln p(\mathbf{y}_n \mid \mathbf{X}, g_n) \mid_{g_n=\boldsymbol{\mu}_n}$  for each  $n$ .
3 Initialise  $\mathbf{x}$  to random location near soma of target neuron and with random laser power.
4 while target not converged do
5   for  $n = 1, \dots, N$  do
6     Compute mean and variance of posterior predictive distribution at current target estimate
        $\mathbf{x}$  via  $\mu_n(\mathbf{x}) = m_n(\mathbf{x}) + k(\mathbf{X}, \mathbf{x})^\top \mathbf{K}^{-1}(\boldsymbol{\mu}_n - m_n(\mathbf{X}))$ , and
        $\sigma_n^2(\mathbf{x}) = k(\mathbf{x}, \mathbf{x}) - k(\mathbf{X}, \mathbf{x})^\top (\mathbf{K} + \mathbf{W}_n^{-1})^{-1} k(\mathbf{X}, \mathbf{x})$ .
7     Sample ORFs at the current target estimate,  $g_n^{(s)}(\mathbf{x}) \sim \text{Normal}(\mu_n(\mathbf{x}), \sigma_n^2(\mathbf{x}))$  for
        $s = 1, \dots, S$ .
8     Construct approximate gradients  $\tilde{\nabla}_{\mathbf{x}} g_n^{(s)}$  for  $s = 1, \dots, S$  using Equation 17.
9   end
10  Set  $\boldsymbol{\delta}_{\mathbf{x}} = -\frac{2}{S} \sum_{s=1}^S \sum_{n=1}^N (\Omega_n - \sigma(g_n^{(s)}(\mathbf{x})) \sigma'(g_n^{(s)}(\mathbf{x})) \tilde{\nabla}_{\mathbf{x}} g_n^{(s)}(\mathbf{x}))$  as per Equation 13.
11  Perform gradient descent update,  $\mathbf{x} \leftarrow \mathbf{x} + \beta \boldsymbol{\delta}_{\mathbf{x}}$  with step-size  $\beta$ .
12  Project laser power onto feasible domain,  $I \leftarrow \min(I, I_{\max})$ .
13 end

```

---

activity, but now using the MAP estimates  $\mathcal{G} = \{\hat{g}_n, \hat{\theta}_n\}_{n=1}^N$  in place of the full posterior distributions. Let  $\hat{y}(\mathbf{x}, \mathcal{G}) = (\sigma(\hat{\gamma}_1(\mathbf{x}) - \hat{\theta}_1), \dots, \sigma(\hat{\gamma}_N(\mathbf{x}) - \hat{\theta}_N))$  be the predicted population response to an ensemble stimulus, where  $\hat{\gamma}_n(\mathbf{x}) = \sum_{j=1}^J \hat{g}_n(\mathbf{x}^j)$ . The optimal ensemble stimulus is now

$$\mathbf{x}_{\text{optimal}} = \underset{\mathbf{x}}{\operatorname{argmin}} \|\boldsymbol{\Omega} - \hat{y}(\mathbf{x}, \mathcal{G})\|^2 = \underset{\mathbf{x}}{\operatorname{argmin}} \sum_{n=1}^N \left( \Omega_n - \sigma(\hat{\gamma}_n(\mathbf{x}) - \hat{\theta}_n) \right)^2 \quad (18)$$

such that  $0 \leq I \leq I_{\max}$ . Evaluating the partial derivative of Equation 18 with respect to dimension  $d$  of a test point  $\mathbf{x}^*$  yields,

$$\frac{\partial}{\partial x_d^*} \|\boldsymbol{\Omega} - \hat{y}(\mathbf{x}^*, \mathcal{G})\|^2 = -2 \sum_{n=1}^N (\Omega_n - \sigma(\hat{\gamma}_n(\mathbf{x}^*) - \hat{\theta}_n)) \sigma'(\hat{\gamma}_n(\mathbf{x}^*) - \hat{\theta}_n) \frac{\partial}{\partial x_d^*} \hat{\gamma}_n(\mathbf{x}^*). \quad (19)$$

The derivative on the right-hand side of Equation 19 is given by  $\frac{\partial}{\partial x_d^*} \hat{\gamma}_n(\mathbf{x}) = \sum_{j=1}^J \frac{\partial}{\partial x_d^*} \hat{g}_n(\mathbf{x}^j)$ , which requires computing the derivative of  $\hat{g}_n(\mathbf{x}^j)$ . To evaluate this derivative, we use a similar trick to Equation 16, but substituting the MAP estimate in place of the posterior mean or Monte Carlo sample,

$$\frac{\partial}{\partial x_d^*} \hat{g}_n(\mathbf{x}^*) = \frac{\partial}{\partial x_d^*} m_n(\mathbf{x}^*) + \operatorname{cov} \left( g_n(\mathbf{X}), \frac{\partial}{\partial x_d^*} g_n(\mathbf{x}^*) \right)^\top \mathbf{K}^{-1}(\hat{g}_n(\mathbf{X}) - m_n(\mathbf{X})). \quad (20)$$

This expression can also be arrived at by first evaluating the posterior predictive mean of  $g_n(\mathbf{x}^*)$ , and then differentiating with respect to  $x_d^*$ .

We use Equation 20 to define a closed-form gradient  $\nabla_{\mathbf{x}^*} \hat{\gamma}_n$  at test point  $\mathbf{x}^*$  via

$$\nabla_{\mathbf{x}^*} \hat{\gamma}_n = \left[ \frac{\partial \hat{\gamma}_n(\mathbf{x}^*)}{\partial x_1^*}, \dots, \frac{\partial \hat{\gamma}_n(\mathbf{x}^*)}{\partial x_D^*} \right]^\top. \quad (21)$$

Finally, Equation 21 is used in the projected gradient descent algorithm for optimising ensemble stimuli (Algorithm 1).

## 6.7 Further details on simulations and "synthetic" optogenetics experiments

Simulations consisted of both ORF mapping and stimulus optimisation phases. ORF mapping required probing responses to stimulation at a range of laser powers and stimulus locations. We

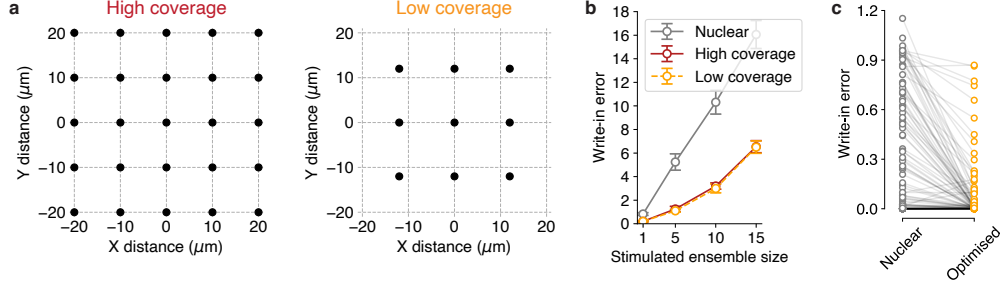

Figure S1: Effect of reducing the number of points at which each ORF is probed. (a) In the high coverage case (left), each ORF is probed by stimulating at a  $5 \times 5$  grid of points near the soma (grid points separated by  $10 \mu\text{m}$ ), at three different laser powers. In the low coverage case (right), this reduces to stimulating at just a  $3 \times 3$  grid (grid points separated by  $12 \mu\text{m}$ ) at three powers. However, as the density of opsin-expressing neurons increases, ORFs are probed at high density even in the low coverage case as the grids from different neurons increasingly overlap. (b) Minimal performance difference between the high and low coverage cases in simulations with 50 neurons. (c) Reduction in optical write-in error using cell-attached recordings as in [Figure 4](#), but with low coverage. Reduction in average write-in error, 74% (c.f. 85% with high coverage, [Figure 4c](#)).

defined a grid of stimulation points surrounding each neuron. In the spatial dimensions, the grid ranged from  $-20 \mu\text{m}$  to  $20 \mu\text{m}$  relative to the centroid of the neuron in steps of  $10 \mu\text{m}$ , and powers ranged from 30 mW to 70 mW in steps of 20 mW. The complete grid was thus given by the Cartesian product  $\{-20, -10, 0, 10, 20\} \times \{-20, -10, 0, 10, 20\} \times \{30, 50, 70\}$ . For opsin-expressing neurons that were spaced far apart, this coarse-resolution grid was sufficient because risk of OTS was low, and therefore ORF mapping was not needed at high detail. On the other hand, as the density of opsin-expressing neurons increased, the grids surrounding each neuron increasingly overlapped with each other, resulting in much denser sampling of the ORFs.

For the synthetic optogenetics experiments (based on the cell-attached recordings), we used the same spatial grid spacing but used laser powers of 10, 25, and 40 mW to match the range of powers used in the underlying slice experiment, though note that the slice experiment had a denser spacing than our chosen 15 mW (see example loose-patch recordings below), which we chose to reduce the ORF mapping time. For the optogenetics experiments involving three spatial dimensions, we extended the grid sampling to include depths of  $-60 \mu\text{m}$  to  $60 \mu\text{m}$  in steps of  $30 \mu\text{m}$ . We also explored the effect of reducing the number of probed grid points to further reduce the time spent mapping ORFs, and found that Bayesian target optimisation maintained high performance when probing with a  $3 \times 3$  spatial grid of  $\{-12, 0, 12\} \times \{-12, 0, 12\}$  ([Figure S1](#)).

We selected the parameters of the GP covariance kernel using 5-fold cross-validation on a separate set of recordings that were made on the same set of four cells, ensuring the hyperparameter selection was using out-of-sample data. Cross-validation was performed using a grid search over a set of possible hyperparameters: the possible radial lengthscales were 2, 4, 8, 16, the power lengthscales were 2, 4, 8, 16, and the amplitudes were 1, 2, 4, 8, 16. For each hyperparameter combination  $\theta$  and for each cell, we used Newton's method to fit the GP-Bernoulli model to 80% of the trials in the loose-patch data, yielding an ORF estimate  $\hat{g}_\theta$ . On the remaining 20% of the trials (denoted as  $\mathcal{T}_{\text{held-out}}$ ), we evaluated the log-likelihood,  $\sum_{t \in \mathcal{T}_{\text{held-out}}} \{y_t \ln(\sigma(\hat{g}_\theta(\mathbf{x}_t))) + (1 - y_t) \ln(1 - \sigma(\hat{g}_\theta(\mathbf{x}_t)))\}$ . We averaged the log-likelihood across all five folds and across all four cells, and chose the hyperparameter combination  $\theta$  that yielded the largest average log-likelihood, resulting in a radial lengthscale of 8, a power lengthscale of 16, and a kernel amplitude of 8.

The GP parameters for generating the simulations in [Figure 3](#), inferring the resulting ORFs, and generating synthetic optogenetics experiments with two and three spatial dimensions are given in [Table S1](#). For reference, a typical ORF mean function is given in [Figure S2](#).

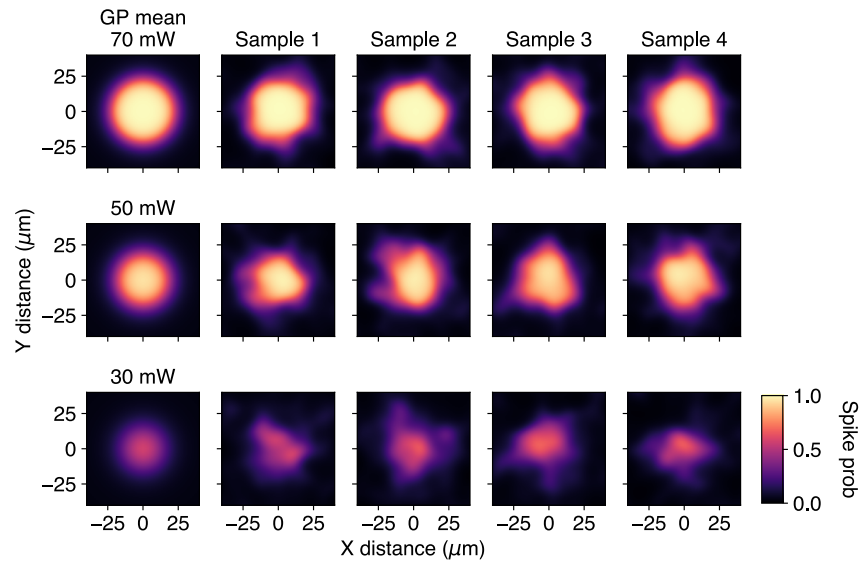

Figure S2: Example mean function (shown at three powers) used for simulations (left column). Also shown are four samples from the ORF prior corresponding to this mean function (right four columns). Parameters given in [Table S1](#).

| Parameter                                                     | Symbol       | Value                       |
|---------------------------------------------------------------|--------------|-----------------------------|
| Simulations (data generation)                                 |              |                             |
| Mean function excitability                                    | $\rho$       | 0.125                       |
| Mean function width                                           | $\sigma_m^2$ | $3 \times 10^2 \mu\text{m}$ |
| Spike threshold                                               | $\theta$     | 3.5                         |
| Kernel radial lengthscale                                     | $\lambda_s$  | $8 \mu\text{m}$             |
| Kernel power lengthscale                                      | $\lambda_I$  | 20 mW                       |
| Kernel amplitude                                              | $\alpha^2$   | 0.2                         |
| Kernel marginal variance                                      | $\sigma_d^2$ | $10^{-5}$                   |
| Simultaneously stimulated neurons during ORF mapping          | $J$          | 10                          |
| Simulations (ORF inference)                                   |              |                             |
| Mean function excitability                                    | $\rho$       | 0.125                       |
| Mean function width                                           | $\sigma_m^2$ | $3 \times 10^2 \mu\text{m}$ |
| Kernel radial lengthscale                                     | $\lambda_s$  | $5 \mu\text{m}$             |
| Kernel power lengthscale                                      | $\lambda_I$  | 16 mW                       |
| Kernel amplitude                                              | $\alpha^2$   | 1                           |
| Kernel marginal variance                                      | $\sigma_d^2$ | $10^{-5}$                   |
| Learning rate for spike thresholds ( $\{\theta_n\}_{n=1}^N$ ) | —            | 5                           |
| Number of random initialisations                              | —            | 5                           |
| Synthetic optogenetics experiments (two spatial dimensions)   |              |                             |
| Mean function excitability                                    | $\rho$       | 0.175                       |
| Mean function width                                           | $\sigma_m^2$ | $3 \times 10^2 \mu\text{m}$ |
| Kernel radial lengthscale                                     | $\lambda_s$  | $8 \mu\text{m}$             |
| Kernel power lengthscale                                      | $\lambda_I$  | 16 mW                       |
| Kernel amplitude                                              | $\alpha^2$   | 8                           |
| Kernel marginal variance                                      | $\sigma_d^2$ | $10^{-5}$                   |
| Learning rate for spike thresholds ( $\{\theta_n\}_{n=1}^N$ ) | —            | 5                           |
| Number of random initialisations                              | —            | 5                           |
| Synthetic optogenetics experiments (three spatial dimensions) |              |                             |
| Mean function excitability                                    | $\rho$       | 0.175                       |
| Mean function width (x/y dimensions)                          | $\sigma_m^2$ | $3 \times 10^2 \mu\text{m}$ |
| Mean function width (z dimension)                             | —            | $3 \times 10^3 \mu\text{m}$ |
| Kernel radial lengthscale (x/y dimensions)                    | $\lambda_s$  | $8 \mu\text{m}$             |
| Kernel axial lengthscale (z dimension)                        | $\lambda_z$  | $32 \mu\text{m}$            |
| Kernel power lengthscale                                      | $\lambda_I$  | 16 mW                       |
| Kernel amplitude                                              | $\alpha^2$   | 8                           |
| Kernel marginal variance                                      | $\sigma_d^2$ | $10^{-5}$                   |
| Learning rate for spike thresholds ( $\{\theta_n\}_{n=1}^N$ ) | —            | 5                           |
| Number of random initialisations                              | —            | 5                           |

Table S1: Parameters used for simulations and generating synthetic optogenetics experiments.

530 **6.8 Additional examples of optogenetic receptive fields from cell-attached recordings**

531 Figures S3 to S6 show examples of four ORFs that have been comprehensively mapped using two-  
 532 photon optogenetic stimulation and cell-attached recordings of evoked spikes. Note the unpredictable  
 533 differences in ORF shape across laser powers and depths, motivating a nonparametric approach.

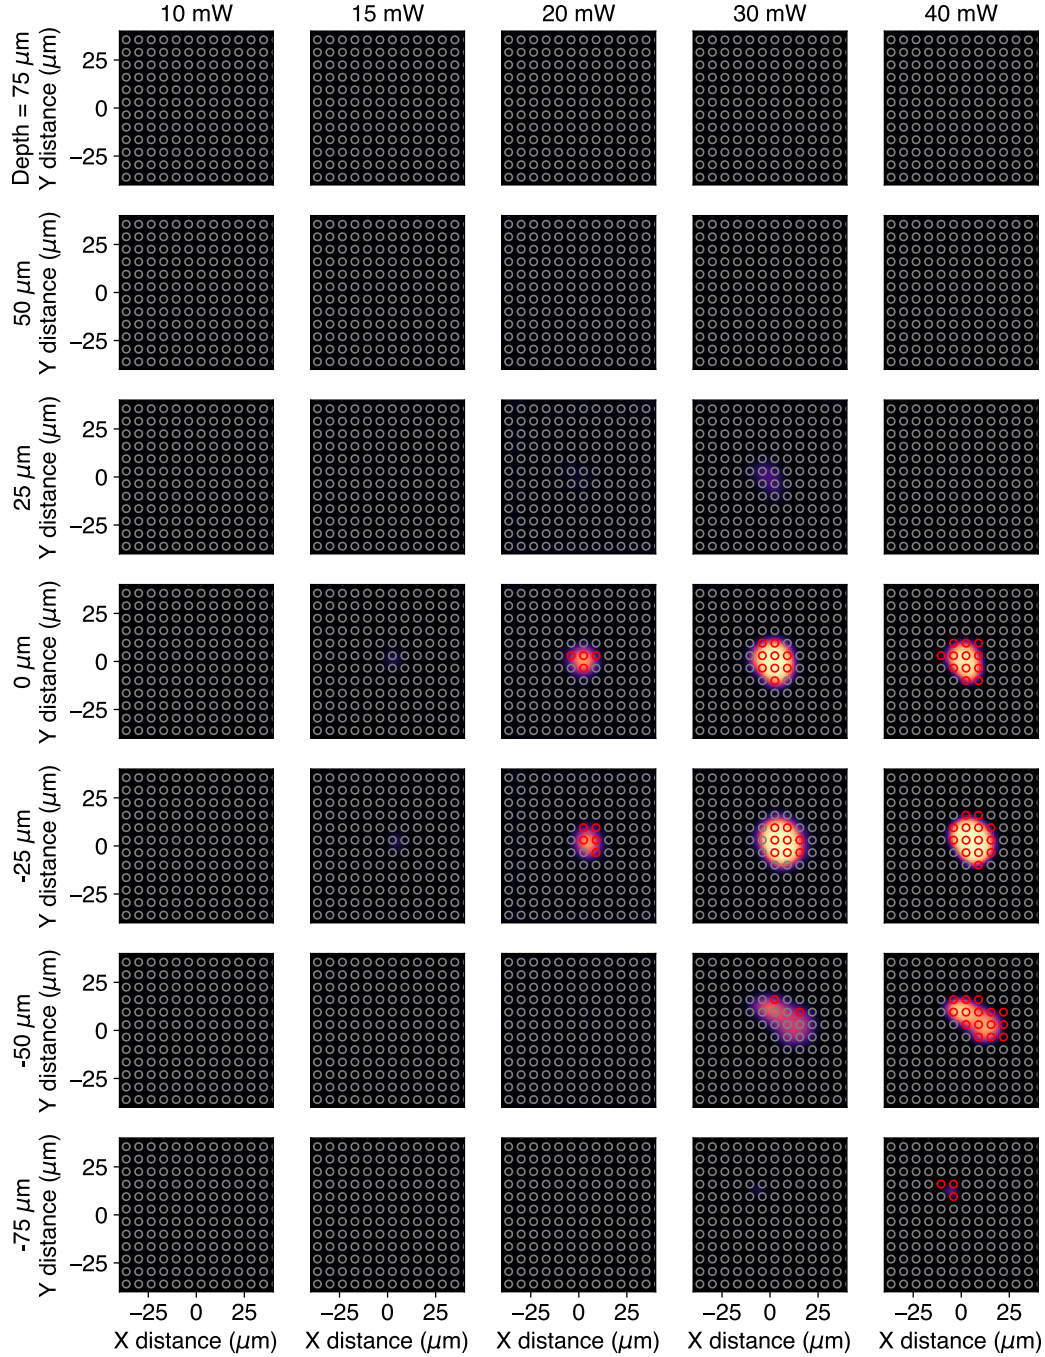

Figure S3: Loose-patch recording and inferred ORF (experiment 1/4).

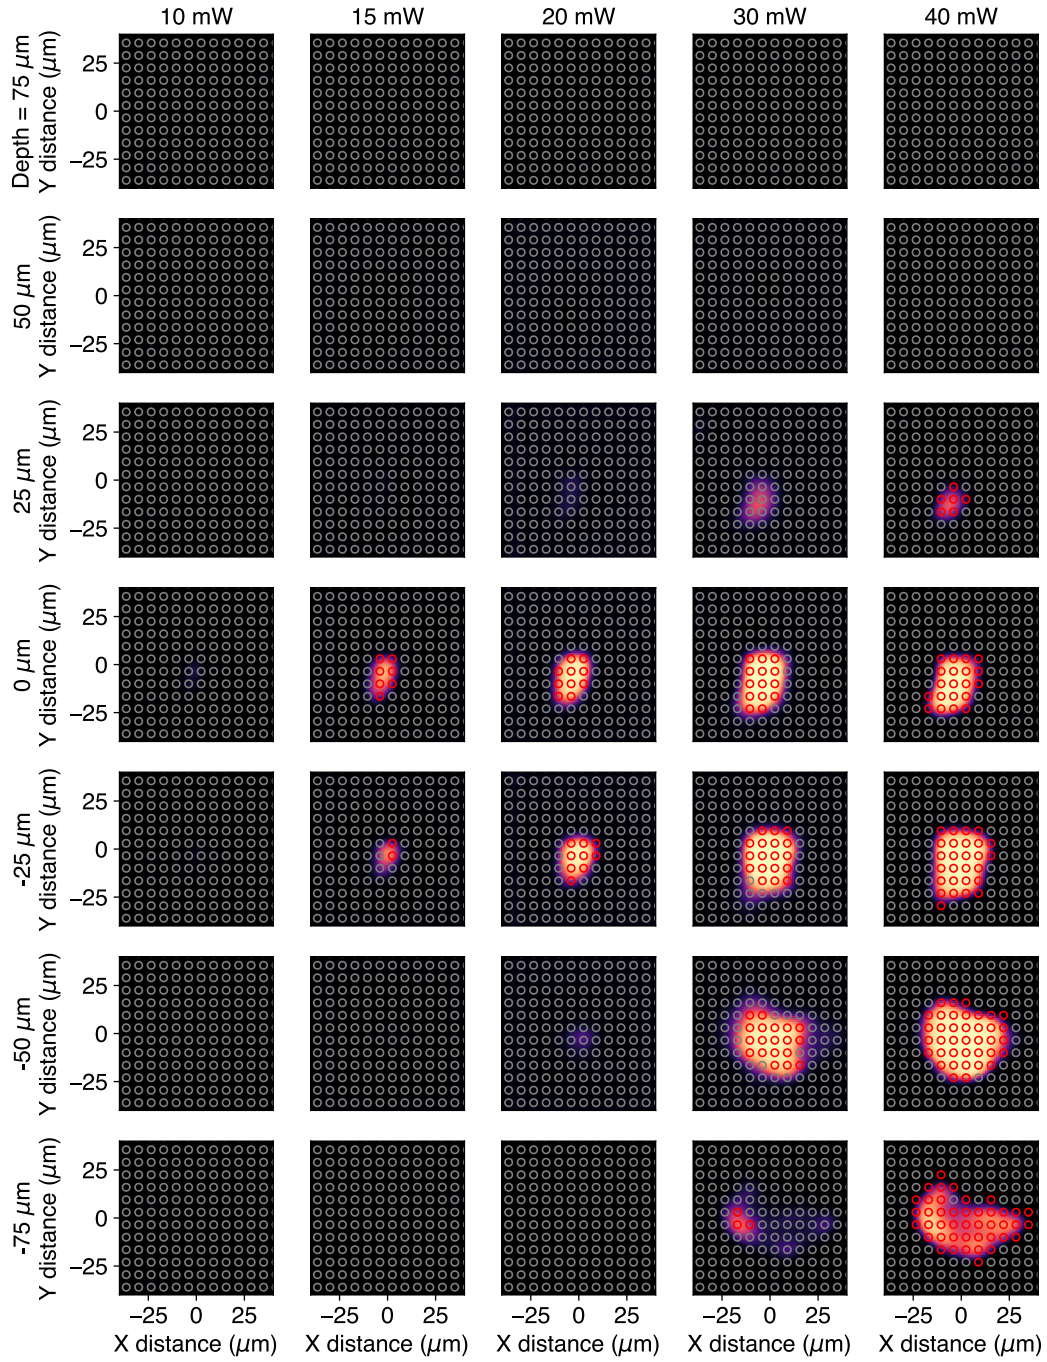

Figure S4: Loose-patch recording and inferred ORF (experiment 2/4)

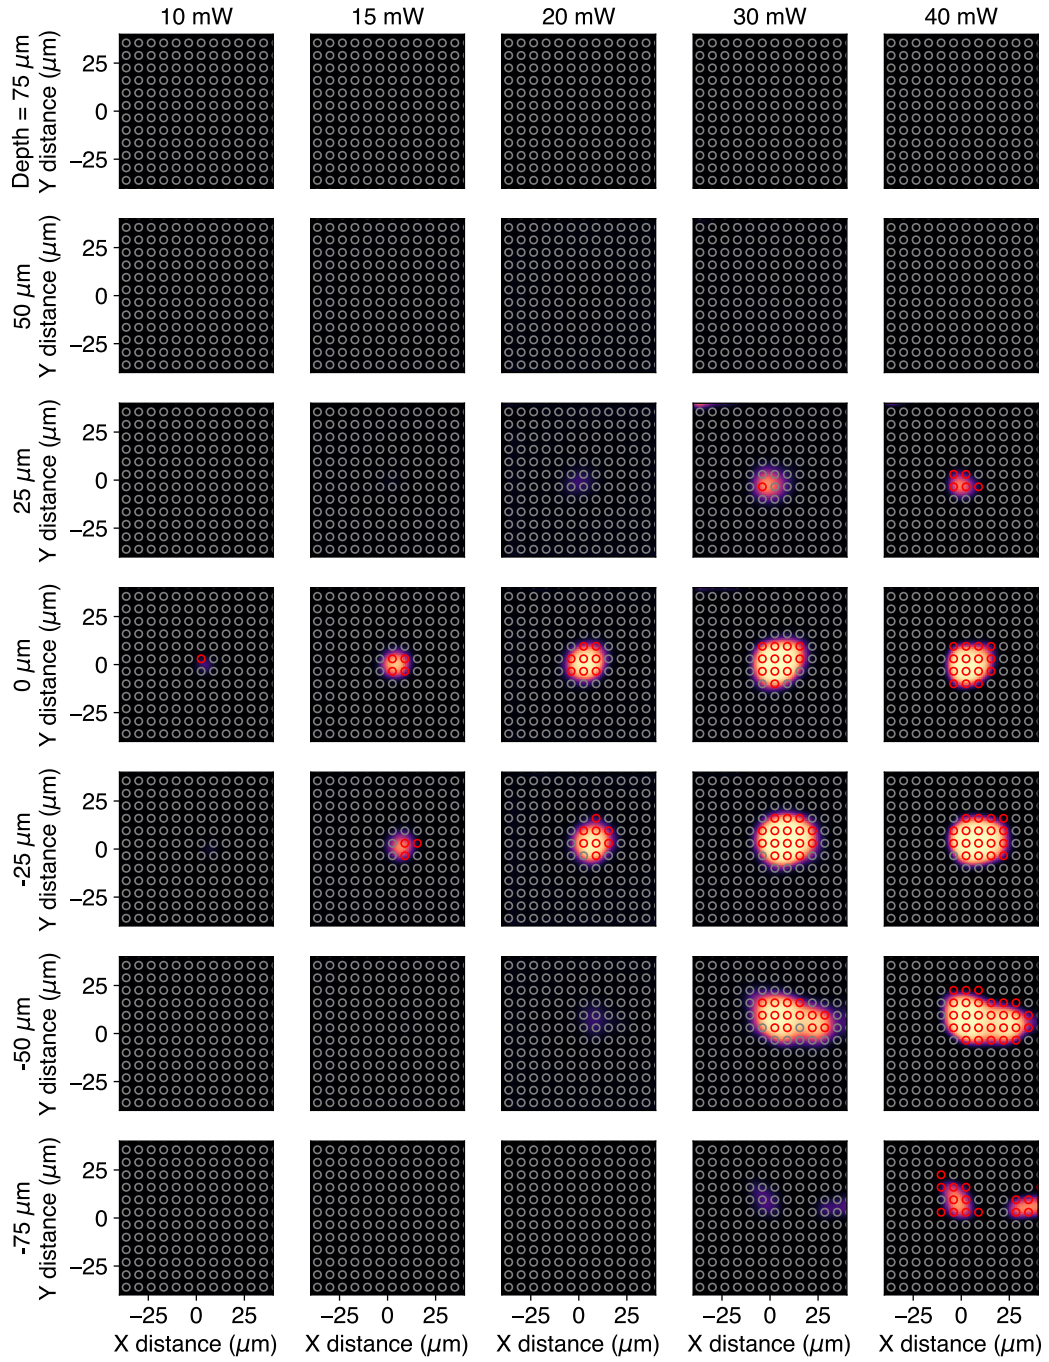

Figure S5: Loose-patch recording and inferred ORF (experiment 3/4)

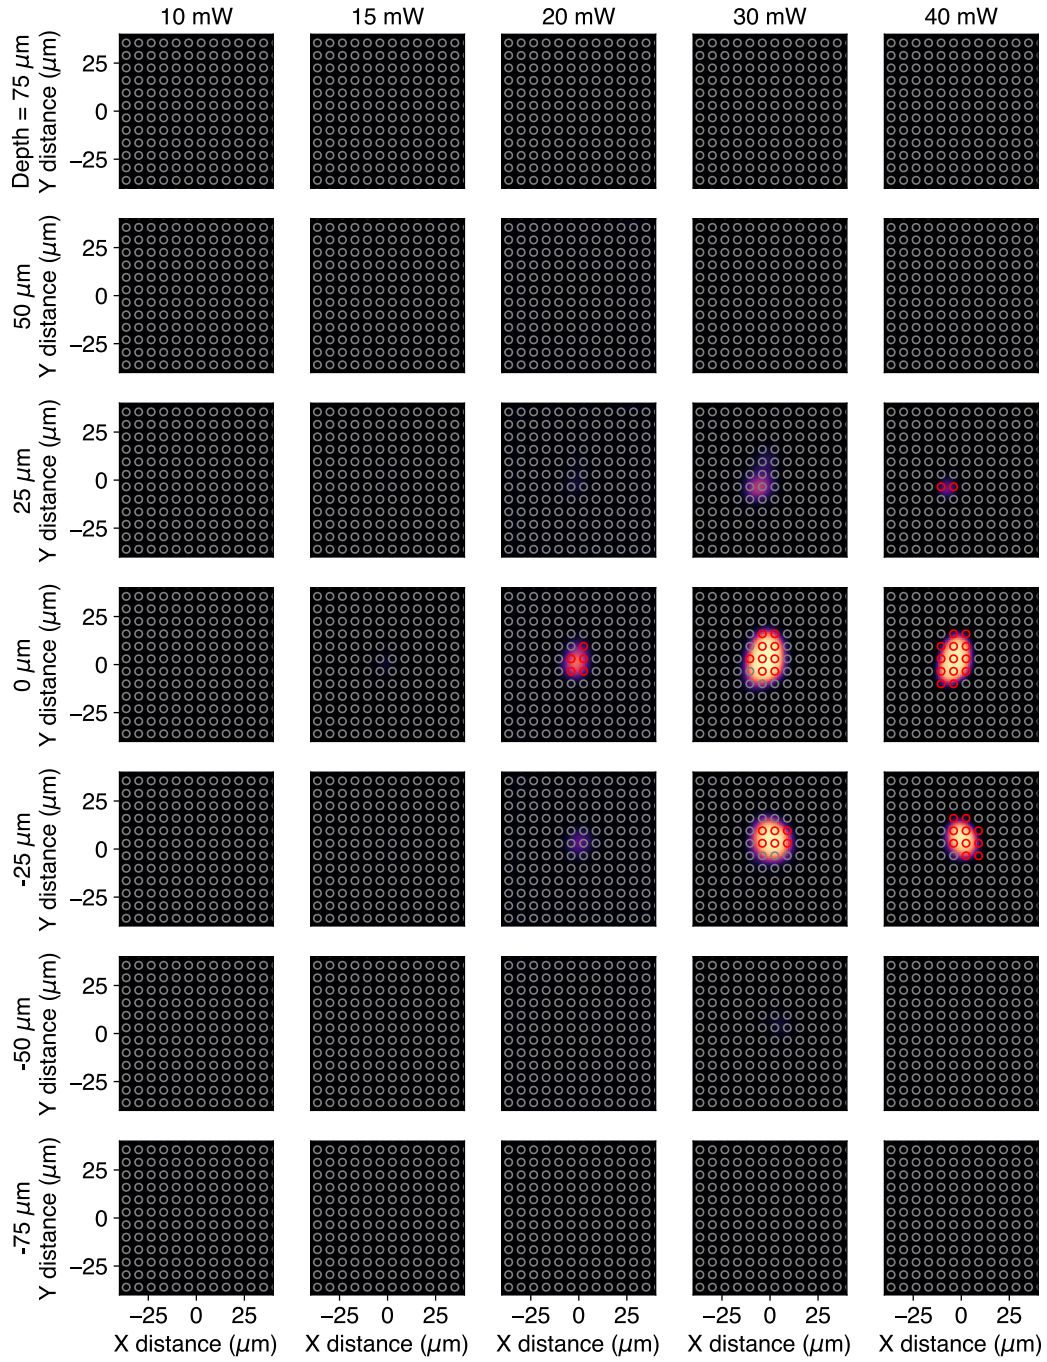

Figure S6: Loose-patch recording and inferred ORF (experiment 4/4)
